# Supplementary material
Source: Elsevier journal article supplement (https://www.sciencedirect.com/science/article/pii/S0048712020300827)
Supplement: mmc1 [file S0048712020300827:mmc1.pdf]

### Material Suplementario 1. Intervenciones de los estudios incluidos en la revisión.

| Estudio                             | Intervención                                                                                                                                                                                                                                                                                                                                                                                                                                                                                                                                                                                                                                                                                                                                                                                                                                                                                                                                                                                                                                                                                                                                                                                                                                                                                                          |
|-------------------------------------|-----------------------------------------------------------------------------------------------------------------------------------------------------------------------------------------------------------------------------------------------------------------------------------------------------------------------------------------------------------------------------------------------------------------------------------------------------------------------------------------------------------------------------------------------------------------------------------------------------------------------------------------------------------------------------------------------------------------------------------------------------------------------------------------------------------------------------------------------------------------------------------------------------------------------------------------------------------------------------------------------------------------------------------------------------------------------------------------------------------------------------------------------------------------------------------------------------------------------------------------------------------------------------------------------------------------------|
| Cai et al., 2017 (22)               | <p>2 sesiones/semana (8 semanas). Hoja de ejercicios domiciliarios.</p> <p>Calentamiento general (estiramientos, bicicleta estática 15min).</p> <ul style="list-style-type: none"> <li>- Ejercicios de MMII (n=28): ejercicios de fuerza para extensores de rodilla y cadera, además de abductores de cadera (3 series de 10 repeticiones con 2min de descanso).</li> <li>- Ejercicios de extensores lumbares (n=28): ejercicios de musculatura extensora lumbar (40-60% contracción isométrica máxima) (3 series de 10 repeticiones con 2 min de descanso entre series). Comienzo con posición en cuadrupedia y progresión a decúbito prono.</li> <li>- Ejercicios de estabilización lumbar (n=28): entrenamiento enfocado en la activación de transversos del abdomen y de multifidos lumbares y ejercicios de CM. Realización en 3 estaciones: <ul style="list-style-type: none"> <li>• Estación 1 (2 semanas): Activación del transverso y multifidos con baja carga en isometría (progresión a 60s de contracción y 10min de sesión).</li> <li>• Estación 2 (2 semanas): Integración de la estabilización lumbar a tareas funcionales.</li> <li>• Estación 3 (4 semanas): Introducción de estabilización a tareas que incluyan alta carga como resistencia en rotación externa de hombro.</li> </ul> </li> </ul> |
| Gallego Izquierdo et al., 2016 (18) | <p>2 veces/día recomendación ejercicio. Sesiones supervisadas de 45 min y sesión en domicilio de 20 min.</p> <ul style="list-style-type: none"> <li>- Entrenamiento de flexión cráneo cervical (n=14): entrenamiento de flexores profundos, baja carga con Stabilizer en decúbito supino (10 repeticiones, se realiza progresión de 20mmHg en retracción cervical 5s hasta 30s realizado durante 10s).</li> <li>- Entrenamiento de propiocepción (n=14): ejercicios de posición de la cabeza (feedback con láser), seguimiento ocular, estabilidad de la mirada y coordinación cabeza-ojo. Se realizan todos los movimientos activos de la región cervical.</li> </ul>                                                                                                                                                                                                                                                                                                                                                                                                                                                                                                                                                                                                                                                |
| Mostagi et al., 2015 (19)           | <p>Sesiones individuales de 1h.</p> <ul style="list-style-type: none"> <li>- Pilates (n=11): suelo y máquinas (Cadillac; Refomer; Step Chair). <ul style="list-style-type: none"> <li>• Semana 1: principios básicos (concentración, control, precisión y respiración). Movimientos fundamentales (respiración, movimiento pélvico (báscula), puente, giros, vuelo y gato) 10 repeticiones.</li> <li>• Semana 2: mismos ejercicios que la 1 semana. Se añade: estiramiento de la columna vertebral (10 repeticiones) y la sierra (10 repeticiones), el Cien con pelota suiza (10 repeticiones).</li> <li>• Semana 3: respiraciones, báscula pélvica, estiramiento de la columna vertebral, El Cien, ejercicio del Puente, ejercicio Retroceder en el Cadillac (10 repeticiones cada ejercicio).</li> <li>• Semana 4: ejercicios 3 semana, brazos laterales y estiramiento de tendones en el Chair (cada ejercicio 10 repeticiones).</li> </ul> </li> </ul>                                                                                                                                                                                                                                                                                                                                                            |

- Semanas 5 y 6: respiraciones, bascula pélvica, estiramiento de la columna, ejercicio de la Sierra (cada ejercicio 10 repeticiones) En el Reformer: serie de piernas, el “Cien”, “Front Split” (8 repeticiones). En el Cadillac: ejercicio de “Teaser”, el Puente, retroceso (8 repeticiones cada ejercicio). En el Chair: brazos laterales, Cisne delantero y estiramiento de tendones (8 repeticiones cada ejercicio).
  - Semanas 7 y 8: respiraciones, bascula pélvica, estiramiento de la columna, ejercicio de la Sierra, natación (cada ejercicio 10 repeticiones) En el Reformer: serie de piernas, El Cien, “Front Split”, Sirena, Tirantes (8 repeticiones). En el Cadillac: ejercicio de “Teaser”, el Puente, retroceso (8 repeticiones cada ejercicio). En el Chair: Cisne delantero y estiramiento de tendones (8 repeticiones cada ejercicio).
- Ejercicio general (n=11): bicicleta estática, estiramientos del tronco y MMII, movilización espinal y fortalecimiento de musculatura del tronco.
- Semana 1: bicicleta estática (10min), estiramientos del tronco y extremidad inferior (30s), movilidad de la columna vertebral sentada y en posición de cuadrupedia (8 repeticiones), ejercicio del puente (8 repeticiones), fortalecimiento del recto abdominal (3 x 8 repeticiones) y estiramiento activo de la cadena posterior (1 x 1min).
  - Semana 2: bicicleta estática (10min), estiramientos del tronco y extremidad inferior (30s), movilidad de la columna vertebral sentada y en posición de cuadrupedia (10 repeticiones), ejercicio del puente (10 repeticiones), fortalecimiento del recto abdominal (3 x 10 repeticiones) y estiramiento activo de la cadena posterior (2 x 1min).
  - Semana 3: bicicleta estática (10min), estiramientos del tronco y extremidad inferior (30s), movilidad de la columna vertebral sentada y en posición de cuadrupedia (10 repeticiones), ejercicio del puente (10 repeticiones), fortalecimiento del recto abdominal (3 x 10 repeticiones), ejercicios de Williams y estiramiento activo de la cadena posterior (2 x 1min).
  - Semana 4: bicicleta estática (10min), estiramientos del tronco y extremidad inferior (30s), movilidad de la columna vertebral sentada y en posición de cuadrupedia (10 repeticiones), ejercicio del puente (10 repeticiones), fortalecimiento del recto abdominal (3 x 15 repeticiones), flexiones laterales del tronco (10 repeticiones), rotaciones de tronco de pie con el murciélago (10 repeticiones), ejercicios de Williams y estiramiento activo de la cadena posterior (2 x 1min).
  - Semanas 5 y 6: bicicleta estática (10min), estiramientos del tronco y extremidad inferior (30s), movilidad de la columna vertebral sentada y en posición de cuadrupedia (10 repeticiones), flexiones laterales del tronco (10 repeticiones), rotaciones de tronco de pie con el murciélago (10 repeticiones), ejercicio del puente con aducción de cadera con una bola (10 repeticiones), fortalecimiento del recto abdominal, de la musculatura oblicua del abdomen y de los músculos del tronco en cuadrupedia (3 x 15 repeticiones de cada ejercicio) y estiramiento activo de la cadena posterior (3 x 1min).
  - Semanas 7 y 8: bicicleta estática (15min), estiramientos del tronco y extremidad inferior (30s), movilidad de la columna vertebral sentada y en posición de cuadrupedia (10 repeticiones), flexiones laterales del tronco (10 repeticiones), rotaciones de tronco de pie con el murciélago (10 repeticiones), ejercicio del puente con aducción de cadera con una bola (3 x 15 repeticiones), fortalecimiento del recto abdominal, de la musculatura oblicua del abdomen y de los músculos del tronco en cuadrupedia (3 x 15 repeticiones de cada ejercicio) y estiramiento activo de la cadena posterior (3 x 1min).

- Schinhan et al., 2016 (23)
- Escalada (n=15): escalar 5 rutas Boulder indoor diferentes (máxima distancia de pies 1.5 m). 10 sesiones de 1h realizadas en 8 semanas.
  - GC (n=15): actividad diaria habitual y paracetamol de 500mg 4 veces/día cuando sea necesario.
- da Luz et al., 2014 (24)
- Las sesiones duraron 1 hora. 2 veces por semana durante un periodo de 6 semanas.
- Pilates suelo (n=43).
  - Pilates máquinas: (Cadillac, Reformer, Ladder Barrel y Step Chair) (n=43).
    - En la primera sesión ambos grupos de entrenamiento comenzaron con activación Powerhouse (contracción isométrica de los músculos transverso del abdomen, glúteos y multifidos durante la respiración diafragmática).
    - Sigüientes sesiones un promedio de 15/20 ejercicios por sesión. Los ejercicios no se repetían más de 10 veces. Se dividieron en tres niveles de dificultad: básico, intermedio y moderado. Los ejercicios se adaptaron al nivel de cada paciente.
- Brooks et al., 2012 (25)
- Ambos programas de ejercicio tuvieron 8 semanas de duración.
- Grupo de ejercicio específico de tronco/Pilates (n=32).
    - 1- Estiramiento de todo el cuerpo.
    - 2- Contracciones abdominales y entrenamiento postural.
    - 3- Ejercicios con el tronco acostado sobre un lado.
    - 4- Ejercicios con el tronco acostado sobre un lado implicando movimiento (colchoneta y Reformer).
    - 5- Ejercicios específicos para la cadera (Reformer).
    - 6- Ejercicios enfocados para las extremidades superiores e inferiores (Reformer).
    - 7- Ejercicios globales (Reformer).
    - 8- Entrenamiento de todo el cuerpo.
  - Grupo de ejercicio general (n=32): 3 veces/semana. Las sesiones duraron entre 50 a 60min.
    - 1- Calentamiento con cadencia baja (bicicleta) y estiramiento de todo el cuerpo.
    - 2- Especialización en las técnicas de trabajo sobre la bicicleta, así como su montaje y la educación de la bicicleta.
    - 3- Ciclismo sentado sobre el sillín en pendiente (cadencia baja con aumento de la resistencia).
    - 4- Ciclismo de pie en las pendientes (cadencias alternas con incremento de la resistencia).
    - 5- Ejercicios enfocados para la cadera sobre la bicicleta en carretera plana (alternancias de cadencias y resistencia).
    - 6- Trabajos mixtos de resistencia/cadencia.
    - 7- Sprint sobre la bicicleta (resistencia reducida/cadencia alta).
    - 8- Calentamiento y estiramiento de todo el cuerpo.

Durante la 1 semana, se dedicaron aproximadamente 30min a los componentes 1 y 2 de ambos programas. Para los componentes 6 a 7 se dedicó de 5 a 10min.

Progresivamente, en la semana 7, se dedicó 25 a 30min de entrenamiento para los componentes 6 y 7, reduciéndose los componentes 1 y 2.

Shnayderman  
et al., 2013  
(26)

Los 2 grupos participaron en programas de tratamiento de 6 semanas (2 veces/semana). Las sesiones duraron 20min en la semana 1 y se fueron incrementando 5min/semana hasta la semana 5.

- Grupo de ejercicio (n=26): ejercicios de fuerza y movilidad de tronco, MMSS y MMII. Calentamiento y enfriamiento de 5min con ejercicios de baja carga. Las sesiones se iniciaron con ejercicios de baja carga, progresando en repeticiones y generando cambios en las posiciones (acostado, sentado, de rodillas).
- Grupo de caminar (n=26): caminar en cinta de correr con calentamientos y enfriamientos de 5min. La intensidad utilizada fue de leve a moderada, basándose en el cálculo de la frecuencia cardíaca en reposo con la fórmula de Karvonen.

Salo et al.,  
2012 (21)

10 sesiones supervisadas para el grupo de fuerza y estiramientos y 1 sesión supervisada para el grupo de estiramientos, durante los 12 meses de intervención.

- Grupo de fuerza y estiramientos (n=49): ejercicios de fuerza isométrica de cuello con bandas elásticas hacia delante, oblicuamente y hacia detrás (80% del RM isométrica). Para cada ejercicio se realizó un conjunto de 15 repeticiones con la carga más alta posible. Se agregaba peso si el paciente podía realizar más repeticiones.
  - Grupo de estiramiento (n=52): estiramientos de cuello, hombros y MMSS.
- A los 3 grupos se les recomendó ejercicio aeróbico 3 veces/semana durante 30min.

Unsgaard-  
Tondel et al.,  
2010 (28)

Frecuencia: 1 día/semana.

- CM (n=36): ejercicios de estabilización lumbopélvica con retroalimentación visual mediante ecografía (40min).
- Ejercicio en cabestrillo (n=36): ejercicios con descarga de pelvis y ejercicios de MMII y MMSS (40min).
- Ejercicio general (n=37): ejercicios de fuerza y estiramientos de tronco y extremidades (1h).

Salo et al.,  
2010 (27)

3 sesiones/semana (12 meses).

Recomendación de realizar ejercicio aeróbico 30min 3 veces/ semana a todos los grupos.

- Entrenamiento de fuerza (n=60): entrenamiento, con banda elástica, de la musculatura del cuello (1 serie de 15 repeticiones) al 80% de la fuerza isométrica máxima. Ejercicios para la parte superior del cuerpo con pesa (15 repeticiones de cada ejercicio con la carga más alta posible). Progresión en el peso si podía hacer 20 repeticiones o más. 1 serie de sentadillas y ejercicios de extensión de espalda y 20min de

estiramientos.

- Entrenamiento de fuerza-resistencia (n=60): ejercicio de flexión cervical (3 series de 20 repeticiones). Mismos ejercicios, para la parte superior del cuerpo, que el grupo anterior, pero con pesas de 2kg y realizando 3 series de 20 repeticiones. 1 serie de sentadillas y extensiones de espalda y 20min de estiramiento.
- GC (n=60): información escrita y 1 sesión de orientación sobre los ejercicios de estiramientos.

Dundar et al.,  
2009 (29)

Sesiones de 60min durante 4 semanas. El grupo de ejercicio acuático realizó los ejercicios bajo supervisión de un fisioterapeuta.

- Ejercicio acuático (n=32): 5 sesiones/semana de 7-8 sujetos, en una piscina a 33°C. 15min de calentamiento, ROM activo y relajación, seguido de 40min de ejercicio: caminar hacia delante, hacia los lados y hacia atrás; ejercicios aeróbicos (saltar, trotar y correr sin desplazamiento); ROM activo MMSS y MMII; estiramientos de cuello, tronco y extremidades; fortalecimiento mediante flexión, extensión, abducción y aducción de cadera, flexión y extensión de rodilla y de MMSS; y relajación en posición supina y nadando. La sesión finalizaba con 5min de enfriamiento (caminar en cuclillas y de pie).
  - Ejercicios domiciliarios (n=33): ejercicios explicados por fisioterapeuta y consejos escritos sobre el programa. Calentamiento; flexión lumbar (sentado y con rotaciones), extensión lumbar (en decúbito prono); movilizaciones y estiramientos (en decúbito supino llevar rodillas al pecho y levantando brazo-pierna contrarios alternando); ejercicios de fuerza MMSS y MMII e isometría en musculatura superficial de tronco; relajación (en decúbito supino); ejercicios aeróbicos (trotar y correr) y enfriamiento (caminar lentamente, posición de cuclillas). 15-20 repeticiones de cada ejercicio, 1 vez/día.
- Este grupo recibió un seguimiento telefónico mediante 1 llamada a la semana.

Harts et al.,  
2008 (30)

10 sesiones (2 sesiones/semana las 2 primeras semanas y 1 sesión/semana las 6 siguientes) supervisadas por fisioterapeuta. Calentamientos de 5min mediante un ergómetro para MMSS y MMII.

- Entrenamiento de fuerza de alta intensidad (n=23): al 50% de la fuerza isométrica máxima en extensión lumbar. El objetivo de cada sesión consistió en realizar entre 15 y 20 repeticiones (sí realizaba más de 20 repeticiones, en la siguiente sesión se incrementaban 2,5kg de resistencia, mientras que sí realizaba menos de 15 repeticiones, se quitaban 2,5kg de resistencia en la siguiente sesión).
- Entrenamiento de fuerza de baja intensidad (n=21): al 20% de la fuerza isométrica máxima en extensión lumbar.
- Lista de espera (n=21): las 8 primeras semanas no reciben tratamiento. Después se aleatorizan en los 2 grupos experimentales y siguen el mismo entrenamiento.

Viljanen et al.,  
2003 (20)

12 semanas (3 veces/semana; 30min) y 1 sesión de refuerzo a los 6 meses.

- Entrenamiento muscular dinámico (n=135): ejercicios activación de grandes grupos musculares de cuello y hombro (pesas de 1 a 3kg cada una, según las repeticiones máximas con un peso de prueba de 7,5kg) y estiramientos seguidos a cada ejercicio.
- Entrenamiento de relajación (n=128): método de relajación progresiva, entrenamiento autógeno, relajación funcional y desensibilización

sistémica.

- GC (n=130): actividad ordinaria.

---

MMII = miembros inferiores; CM = control motor; GC = grupo control; MMSS = miembros superiores; ROM = rango de movimiento
